# Supplementary material for: FDG-PET/CT Versus Contrast-Enhanced CT for Response Evaluation in Metastatic Breast Cancer: A Systematic Review
Source: PubMed Central journal article supplement (PMC6787711; doi:10.3390/diagnostics9030106), 2019-08-27
Supplement: diagnostics-09-00106-s001.pdf [file diagnostics-09-00106-s001.pdf]

**Supplementary content 1:** Full search strategies for PubMed/Medline, Cochrane library, and Embase (conducted on 10<sup>th</sup> October 2017).

**Pubmed/Medline and Cochrane library:**

((breast cancer[MeSH Terms]) OR breast tumor) OR breast tumor\*) OR breast carcinoma) OR breast neoplasms) OR breast neoplasm\*) OR cancer of the breast\*) OR cancer mamma\*) OR mamma\* cancer) OR malignant neoplasia of the breast\*) OR breast malignant neoplasm\*) OR breast malignant tumor\*) OR breast carcinoma\*) OR human mammary carcinoma\*) OR human mammary neoplasm\*) OR breast sarcoma) OR breast sarcoma\*) OR mammary sarcoma\*))

AND

((neoplasm metastases[MeSH Terms]) OR neoplasm metastasis[MeSH Terms]) OR distant metastasis) OR metastasis) OR satellite metastasis) OR metasta\*) OR disseminat\*) OR secondary) OR migrat\*) OR stage 4) OR stage IV) OR stage four) OR advanced cancer) OR advanced)))

AND

(RECIST) OR response evaluation criteria in solid tumors) OR PERCIST) OR PET response criteria in solid tumors)

**Embase** (results shown are from an identical search on 19 December 2017, hence more hits than stated in the article):

|                          |     |                                                                                                       |         |          |                                 |                      |  |
|--------------------------|-----|-------------------------------------------------------------------------------------------------------|---------|----------|---------------------------------|----------------------|--|
| <input type="checkbox"/> | 265 | exp breast cancer/                                                                                    | 398263  | Advanced | <a href="#">Display Results</a> | <a href="#">More</a> |  |
| <input type="checkbox"/> | 266 | exp breast tumor/ or breast tumor*.mp.                                                                | 467308  | Advanced | <a href="#">Display Results</a> | <a href="#">More</a> |  |
| <input type="checkbox"/> | 267 | exp breast carcinoma/ or exp breast neoplasms/ or exp neoplasm*.mp.                                   | 471313  | Advanced | <a href="#">Display Results</a> | <a href="#">More</a> |  |
| <input type="checkbox"/> | 268 | cancer of the breast*.mp.                                                                             | 19070   | Advanced | <a href="#">Display Results</a> | <a href="#">More</a> |  |
| <input type="checkbox"/> | 269 | cancer mamma*.mp.                                                                                     | 304     | Advanced | <a href="#">Display Results</a> | <a href="#">More</a> |  |
| <input type="checkbox"/> | 270 | mamma* cancer.mp.                                                                                     | 3970    | Advanced | <a href="#">Display Results</a> | <a href="#">More</a> |  |
| <input type="checkbox"/> | 271 | malignant neoplasia of the breast*.mp.                                                                | 7       | Advanced | <a href="#">Display Results</a> | <a href="#">More</a> |  |
| <input type="checkbox"/> | 272 | breast malignant neoplasm*.mp.                                                                        | 11      | Advanced | <a href="#">Display Results</a> | <a href="#">More</a> |  |
| <input type="checkbox"/> | 273 | breast malignant tumor*.mp.                                                                           | 46      | Advanced | <a href="#">Display Results</a> | <a href="#">More</a> |  |
| <input type="checkbox"/> | 274 | breast carcinoma*.mp.                                                                                 | 79193   | Advanced | <a href="#">Display Results</a> | <a href="#">More</a> |  |
| <input type="checkbox"/> | 275 | human mammary carcinoma*.mp.                                                                          | 883     | Advanced | <a href="#">Display Results</a> | <a href="#">More</a> |  |
| <input type="checkbox"/> | 276 | human mammary neoplasm*.mp.                                                                           | 3       | Advanced | <a href="#">Display Results</a> | <a href="#">More</a> |  |
| <input type="checkbox"/> | 277 | exp breast sarcoma/ or breast sarcoma*.mp.                                                            | 1016    | Advanced | <a href="#">Display Results</a> | <a href="#">More</a> |  |
| <input type="checkbox"/> | 278 | mammary sarcoma*.mp.                                                                                  | 98      | Advanced | <a href="#">Display Results</a> | <a href="#">More</a> |  |
| <input type="checkbox"/> | 279 | 265 or 266 or 267 or 268 or 269 or 270 or 271 or 272 or 273 or 274 or 275 or 276 or 277 or 278        | 480304  | Advanced | <a href="#">Display Results</a> | <a href="#">More</a> |  |
| <input type="checkbox"/> | 280 | exp distant metastasis/ or metastasis.mp. or exp metastasis/ or exp satellite metastasis/             | 614701  | Advanced | <a href="#">Display Results</a> | <a href="#">More</a> |  |
| <input type="checkbox"/> | 281 | metasta*.mp.                                                                                          | 749790  | Advanced | <a href="#">Display Results</a> | <a href="#">More</a> |  |
| <input type="checkbox"/> | 282 | disseminat*.mp.                                                                                       | 166846  | Advanced | <a href="#">Display Results</a> | <a href="#">More</a> |  |
| <input type="checkbox"/> | 283 | secondary.mp.                                                                                         | 817807  | Advanced | <a href="#">Display Results</a> | <a href="#">More</a> |  |
| <input type="checkbox"/> | 284 | migrat*.mp.                                                                                           | 407042  | Advanced | <a href="#">Display Results</a> | <a href="#">More</a> |  |
| <input type="checkbox"/> | 285 | stage 4.mp.                                                                                           | 9046    | Advanced | <a href="#">Display Results</a> | <a href="#">More</a> |  |
| <input type="checkbox"/> | 286 | Stage IV.mp.                                                                                          | 32287   | Advanced | <a href="#">Display Results</a> | <a href="#">More</a> |  |
| <input type="checkbox"/> | 287 | RECIST.mp.                                                                                            | 13131   | Advanced | <a href="#">Display Results</a> | <a href="#">More</a> |  |
| <input type="checkbox"/> | 288 | Response evaluation criteria in solid tumors.mp. or exp response evaluation criteria in solid tumors/ | 6071    | Advanced | <a href="#">Display Results</a> | <a href="#">More</a> |  |
| <input type="checkbox"/> | 289 | PERCIST.mp.                                                                                           | 409     | Advanced | <a href="#">Display Results</a> | <a href="#">More</a> |  |
| <input type="checkbox"/> | 290 | PET response criteria in solid tumors.mp.                                                             | 105     | Advanced | <a href="#">Display Results</a> | <a href="#">More</a> |  |
| <input type="checkbox"/> | 291 | 265 or 266 or 267 or 268 or 269 or 270 or 271 or 272 or 273 or 274 or 275 or 276 or 277 or 278        | 480304  | Advanced | <a href="#">Display Results</a> | <a href="#">More</a> |  |
| <input type="checkbox"/> | 292 | 280 or 281 or 282 or 283 or 284 or 285 or 286                                                         | 2048951 | Advanced | <a href="#">Display Results</a> | <a href="#">More</a> |  |
| <input type="checkbox"/> | 293 | 291 and 292                                                                                           | 137172  | Advanced | <a href="#">Display Results</a> | <a href="#">More</a> |  |
| <input type="checkbox"/> | 294 | 287 or 288 or 289 or 290                                                                              | 15178   | Advanced | <a href="#">Display Results</a> | <a href="#">More</a> |  |
| <input type="checkbox"/> | 295 | 293 and 294                                                                                           | 1150    | Advanced | <a href="#">Display Results</a> | <a href="#">More</a> |  |
| <input type="checkbox"/> | 296 | exp advanced cancer/ or advanced.mp.                                                                  | 531665  | Advanced | <a href="#">Display Results</a> | <a href="#">More</a> |  |
| <input type="checkbox"/> | 297 | stage four.mp.                                                                                        | 340     | Advanced | <a href="#">Display Results</a> | <a href="#">More</a> |  |
| <input type="checkbox"/> | 298 | 280 or 281 or 282 or 283 or 284 or 285 or 286 or 296 or 297                                           | 2451792 | Advanced | <a href="#">Display Results</a> | <a href="#">More</a> |  |
| <input type="checkbox"/> | 299 | 291 and 298                                                                                           | 153306  | Advanced | <a href="#">Display Results</a> | <a href="#">More</a> |  |
| <input type="checkbox"/> | 300 | 294 and 299                                                                                           | 1372    | Advanced | <a href="#">Display Results</a> | <a href="#">More</a> |  |
